# Supplementary material
Source: Elsevier journal article supplement (https://rcastoragev2.blob.core.windows.net/efcb9a93551fe29610ee7a125ce67732/mmc2.pdf)
Supplement: mmc2 [file mmc2.pdf]

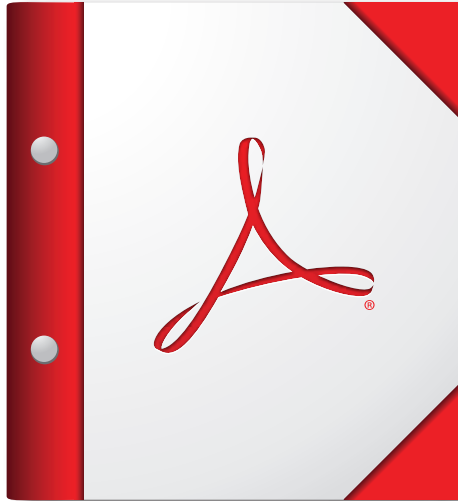

**For the best experience, open this PDF portfolio in  
Acrobat 9 or Adobe Reader 9, or later.**

**Get Adobe Reader Now!**
